# Supplementary material for: Mouse Model of Congenital Heart Defects, Dysmorphic Facial Features and Intellectual Developmental Disorders as a Result of Non-functional CDK13
Source: PubMed Central journal article supplement (PMC6694211; doi:10.3389/fcell.2019.00155), 2019-08-07
Supplement: Image_3.pdf [file Image_3.pdf]

A

# Cdk 13 wt

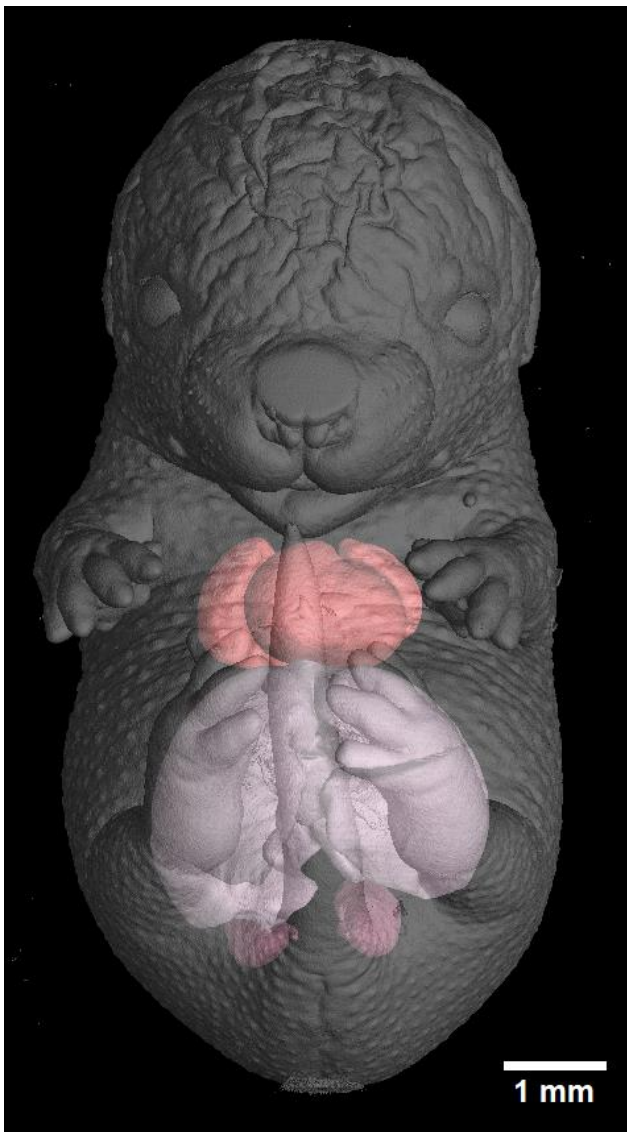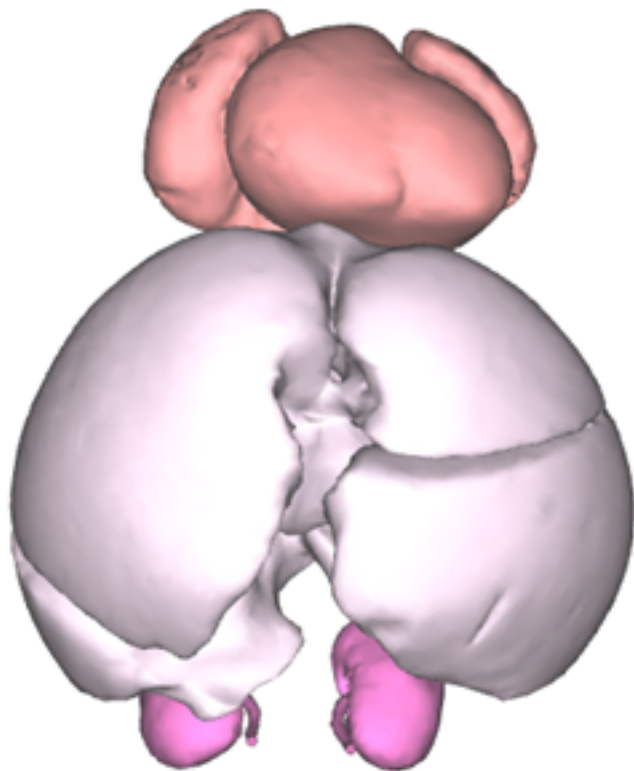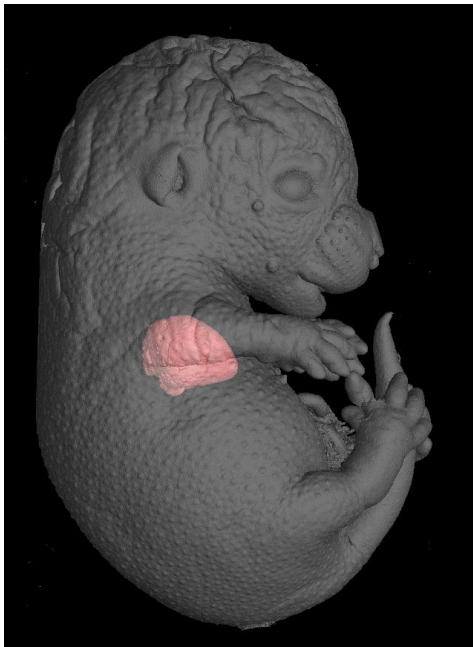

HEART

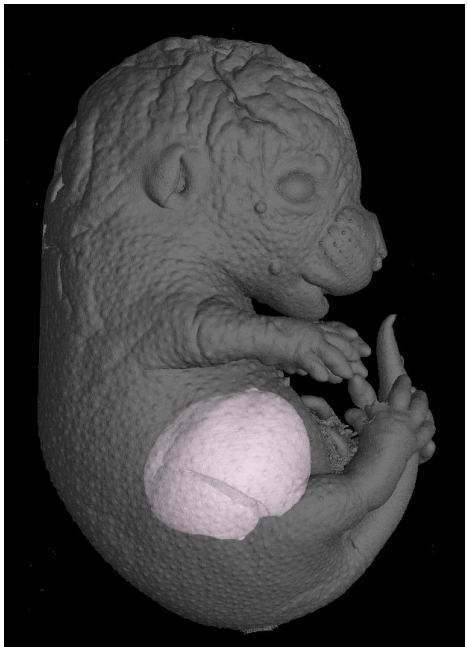

LIVER

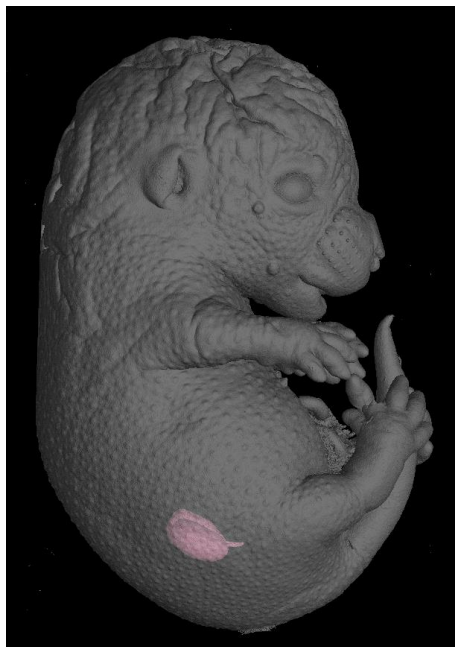

KIDNEYS

B

# Cdk 13 KO

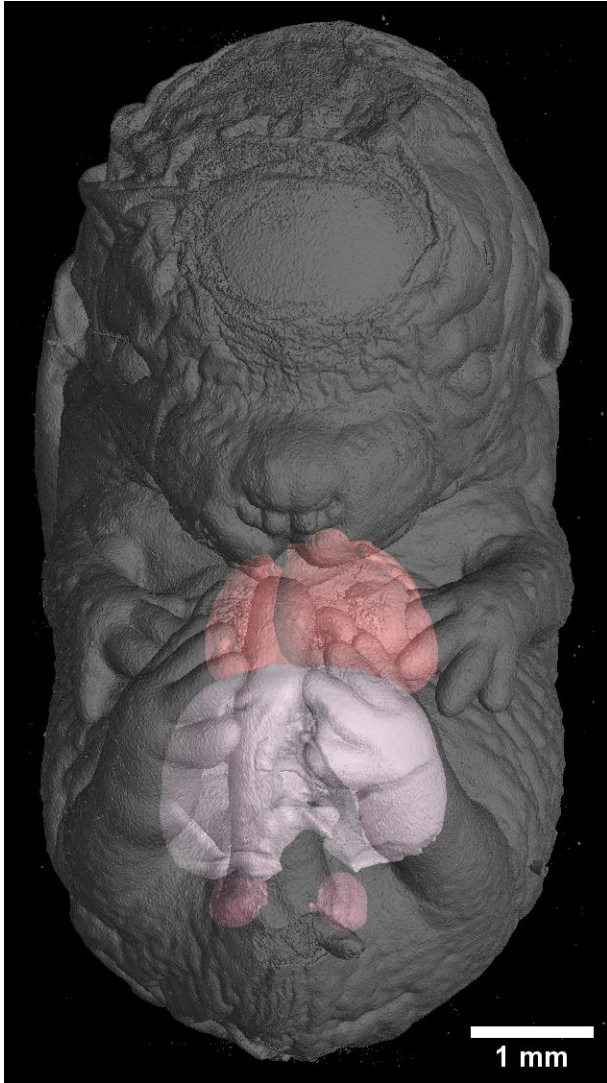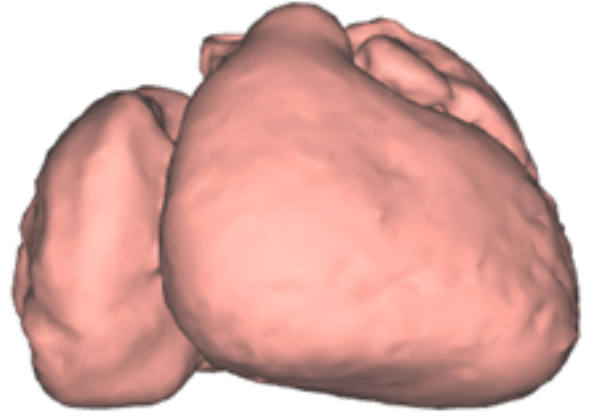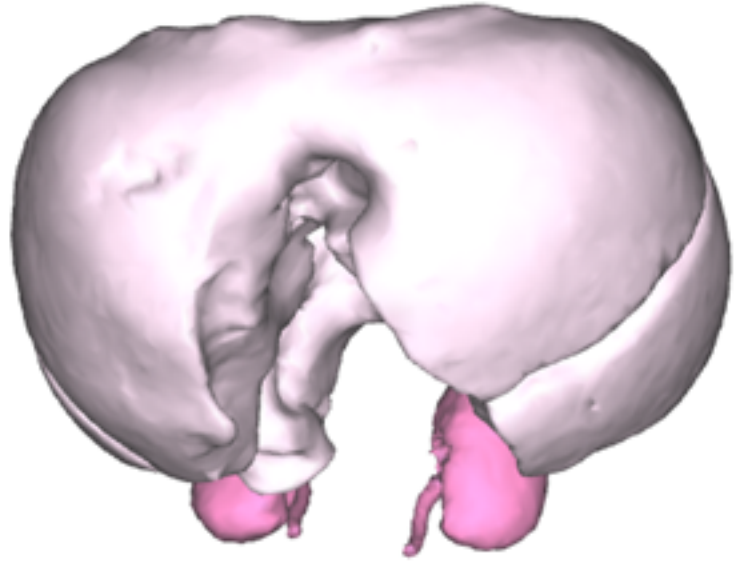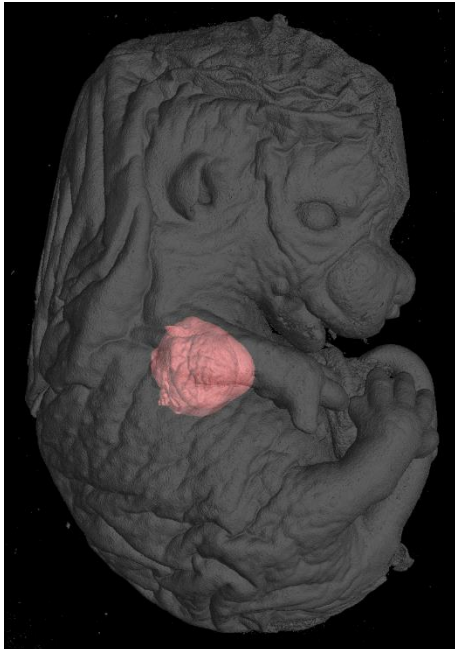

HEART

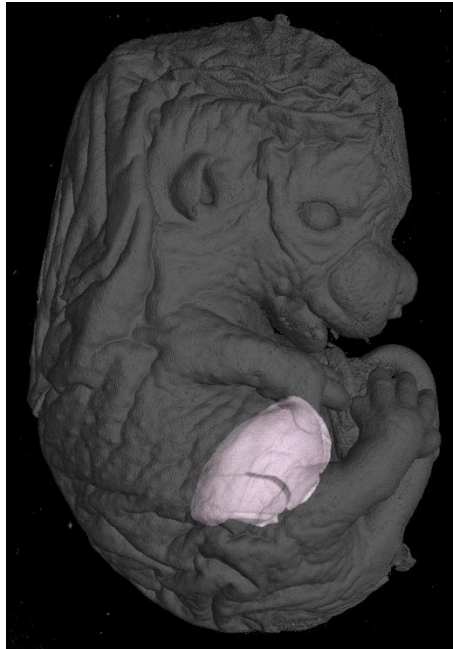

LIVER

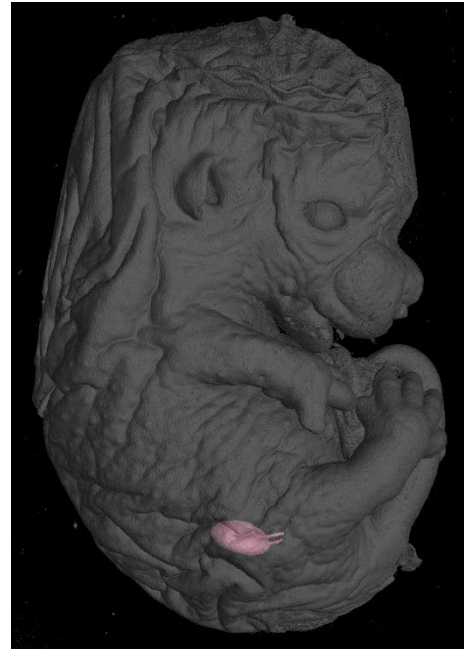

KIDNEYS
